# Supplementary material for: Combination Regimens of Favipiravir Plus Interferon Alpha Inhibit Chikungunya Virus Replication in Clinically Relevant Human Cell Lines
Source: PubMed Central journal article supplement (PMC7912990; doi:10.3390/microorganisms9020307), 2021-02-02
Supplement: microorganisms-09-00307-s001.pdf [file microorganisms-09-00307-s001.pdf]

**Supplemental material**
*FAV Triphosphate Assay*

HT-1080, SK-N-MC, and HFF-1 cells were treated with various concentrations of FAV ranging from 0 to 157.10  $\mu\text{g/ml}$  for one day. Cells were harvested and separated from drug containing medium by centrifugation and washed twice with PBS to ensure removal of extracellular FAV. FAV and FAV-RTP were quantified via LC-MS/MS. Our system consisted of a 1260 HPLC (Agilent) and a 6460 triple quadrupole mass spectrometer (Agilent). Protein precipitation was achieved by Trichloroacetic acid (TCA). The supernatant was obtained by centrifugation and  $\text{NH}_4\text{OH}$  was used to adjust the pH to a weak base. The FAV was analyzed using a Kinetex 2.6  $\mu\text{m}$  Polar C18 LC column,  $50 \times 2.1\text{mm}$ . Mobile phases consisted of 0.1% Formic acid in water (A) and methanol (B) at a flow rate of 0.4 ml/min in gradient mode. The FAV-RTP was analyzed using a hypercarb 5  $\mu\text{m}$  LC column,  $50 \times 4.6\text{mm}$ . Mobile phases consisted of 0.1%  $\text{NH}_4\text{OH}$  in water (A) and ACN/IPA (1:3) (B) at a flow rate of 0.4 ml/min in gradient mode. The mass transition (MRM) of FAV  $m/z$  156  $\rightarrow$  113 in positive ion mode, and FAV-RTP  $m/z$  528  $\rightarrow$  159 in negative ion mode.

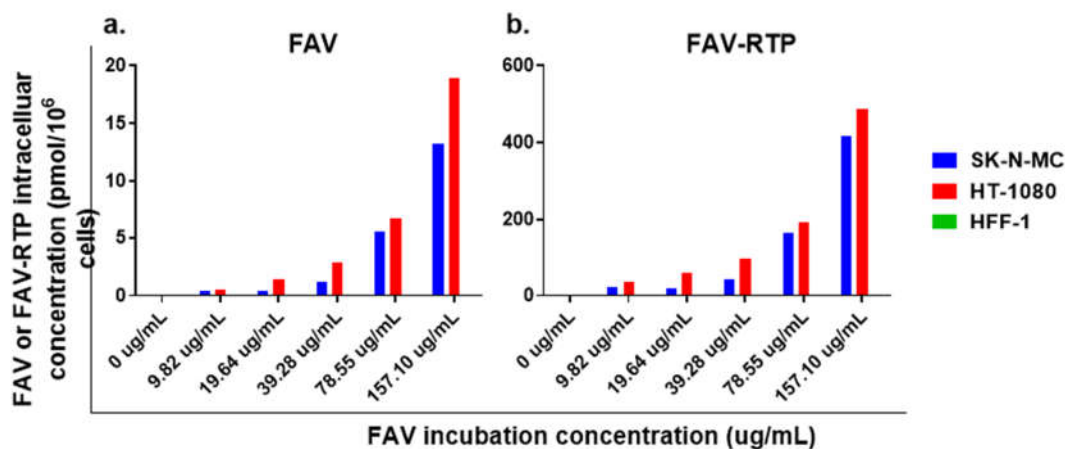

**Supplemental Figure 1:** Intracellular concentrations of FAV (a) and FAV-RTP (b) in HT-1080, SK-N-MC, and HFF-1 cells. Cells were incubated with increasing concentrations of FAV ranging from 0 to 157.1  $\mu\text{g/ml}$  for one day then extracellular FAV was removed and intracellular FAV and FAV-RTP concentrations were quantified via LC-MS/MS.
